# Supplementary material for: Atomic-level structure of the amorphous drug atuliflapon via NMR crystallography
Source: Royal Society of Chemistry journal article supplement (doi:10.1039/d4fd00078a), 2024-07-17
Supplement: d4fd00078a1.pdf [file d4fd00078a1.pdf]

# Atomic-level structure of the amorphous drug Atuliflapon by NMR crystallography

Jacob B. Holmes<sup>1,2</sup>, Daria Torodii<sup>1</sup>, Martins Balodis<sup>1</sup>, Manuel Cordova<sup>1,2</sup>, Albert Hofstetter<sup>1</sup>, Federico Paruzzo<sup>1</sup>, Sten Nilsson Lill<sup>3</sup>, Emma Eriksson<sup>3</sup>, Pierrick Berruyer<sup>1</sup>, Bruno Simões de Almeida<sup>1</sup>, Mike Quayle<sup>4</sup>, Stefan Norberg<sup>4</sup>, Anna Svensk Ankarberg<sup>4</sup>, Staffan Schantz<sup>4\*</sup>, Lyndon Emsley<sup>1,2\*</sup>

<sup>1</sup> Institut des Sciences et Ingénierie Chimiques, Ecole Polytechnique Fédérale de Lausanne (EPFL), CH-1015 Lausanne, Switzerland

<sup>2</sup> National Centre for Computational Design and Discovery of Novel Materials MARVEL, Ecole Polytechnique Fédérale de Lausanne (EPFL), CH-1015 Lausanne, Switzerland.

<sup>3</sup> Data Science & Modelling, Pharmaceutical Sciences, R&D, AstraZeneca, Gothenburg, Sweden

<sup>4</sup> Oral Product Development, Pharmaceutical Technology & Development, Operations, AstraZeneca, Gothenburg, Sweden.

## Supporting Information

**Raw data statement:** All data and code used are available from <https://doi.org/10.24435/materialscloud:9r-b9> under the license CC-BY-4.0 (Creative Commons Attribution-ShareAlike 4.0 International).

## Table of Contents

|                                                                          |   |
|--------------------------------------------------------------------------|---|
| 1. Experimental Details                                                  | 1 |
| 2. Molecular Dynamic Simulations                                         | 1 |
| 3. Experimental chemical shift distributions                             | 1 |
| 4. Predicted chemical shift distributions                                | 4 |
| 5. Relative Cluster Energies of molecular interactions and conformations | 8 |

## Experimental Details

All spectra used in this analysis have previously been published in ref <sup>1</sup> and can be referred to for more detail. The <sup>1</sup>H spectrum was collected using a 0.7mm probe at a <sup>1</sup>H larmor frequency of 900 MHz at 298K with an MAS rate of 62.5kHz. The <sup>13</sup>C CPMAS and <sup>1</sup>H-<sup>13</sup>C HETCOR spectra were collected using a 1.3 mm probe at a <sup>1</sup>H larmor frequency of 500 MHz.

## Molecular dynamics for the amorphous structures

The MD simulations used here have been reported previously and as described in ref<sup>1</sup>, molecular dynamic (MD) simulations were carried out on periodic amorphous cells with 0, 0.5, 1, 2, and 4% (w/w) of water molecules. The atomic positions from the single crystal XRD structure were used as a starting point for optimization in the gas-phase as the B3LYP-D3/6-31G(d,p)<sup>2-5</sup> level of theory using Gaussian 09 revised D.01 program<sup>6</sup>. CHELPG and optimized coordinates were extracted from the DFT optimization and used to generate the amorphous cells. Cubic amorphous cells were created using Material Studio<sup>7</sup> and COMPASS-II<sup>8</sup> force fields with 128 molecules of AZ5718 within the cells. The OPLS\_2005<sup>9,10</sup> force field parameters generated using Schrödinger ffld\_server<sup>11</sup> with the optimized coordinates and CHELPG charges as inputs. The “ffconv.py” tool was used to convert the topology into GROMCS format<sup>12</sup>. Water was treated using the TIP3P model in the simulations<sup>13</sup>.

## Experimental chemical shift distributions

Table S1: Solid-State NMR assignment of <sup>13</sup>C Chemical shifts of the amorphous AZD5718

| Atom Index | $\mu$ (ppm) | $\sigma$ (ppm) |
|------------|-------------|----------------|
| C1         | 11.38       | 1.73           |
| C2         | 140.38      | 2.29           |
| C3         | 103.36      | 1.93           |
| C4         | 151.09      | 1.5            |
| C7         | 140.38      | 2.29           |
| C8         | 125.58      | 1.22           |
| C9         | 129.73      | 1.89           |
| C10        | 134.84      | 1.53           |
| C11        | 129.73      | 1.89           |
| C12        | 125.58      | 1.22           |
| C13        | 202.66      | 2.81           |
| C14        | 46.95       | 1.83           |
| C15        | 30.78       | 1.88           |
| C16        | 25.93       | 1.54           |
| C17        | 25.93       | 1.54           |
| C18        | 30.78       | 1.88           |
| C19        | 46.95       | 1.83           |
| C20        | 173.79      | 1.91           |
| C22        | 125.58      | 1.22           |
| C23        | 129.74      | 1.89           |

|     |        |      |
|-----|--------|------|
| C26 | 46.95  | 1.83 |
| C27 | 40.38  | 1.39 |
| C29 | 161.41 | 1.91 |
| C30 | 120.61 | 1.29 |

Table S1: Solid-State NMR assignment of  $^1\text{H}$  Chemical shifts of the amorphous AZD5718

| Atom Index | $\mu$ (ppm) | $\sigma$ (ppm) |
|------------|-------------|----------------|
| H1         | 1.56        | 0.55           |
| H3         | 5.17        | 0.82           |
| H6         | 11.84       | 2              |
| H8         | 7.07        | 0.99           |
| H9         | 7.11        | 0.98           |
| H11        | 7.11        | 0.98           |
| H12        | 7.07        | 0.99           |
| H14        | 2.67        | 0.9            |
| H15a       | 0.54        | 0.88           |
| H15b       | 0.54        | 0.88           |
| H16a       | 0.39        | 0.85           |
| H16b       | 0.39        | 0.85           |
| H17a       | 0.39        | 0.85           |
| H17b       | 0.39        | 0.85           |
| H18a       | 0.54        | 0.88           |
| H18b       | 0.54        | 0.88           |
| H19        | 2.67        | 0.9            |
| H23        | 7.11        | 0.98           |
| H26a       | 2.67        | 0.9            |
| H26b       | 2.67        | 0.9            |
| H27a       | 2.87        | 0.79           |
| H27b       | 2.87        | 0.79           |

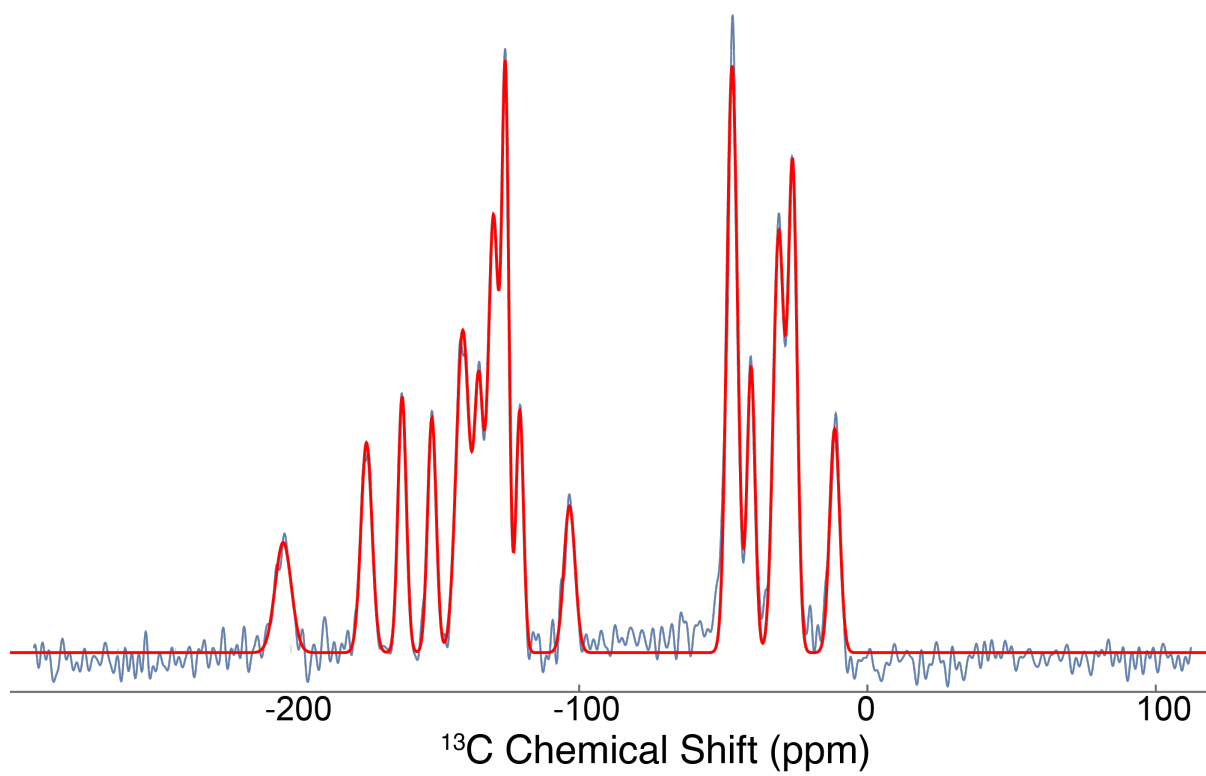

**Figure S1:** Peak fitting of the  $^{13}\text{C}$  CPMAS spectrum (blue) with the Gaussian using the parameters listed in Table S1 (red)

### Predicted chemical shift distributions

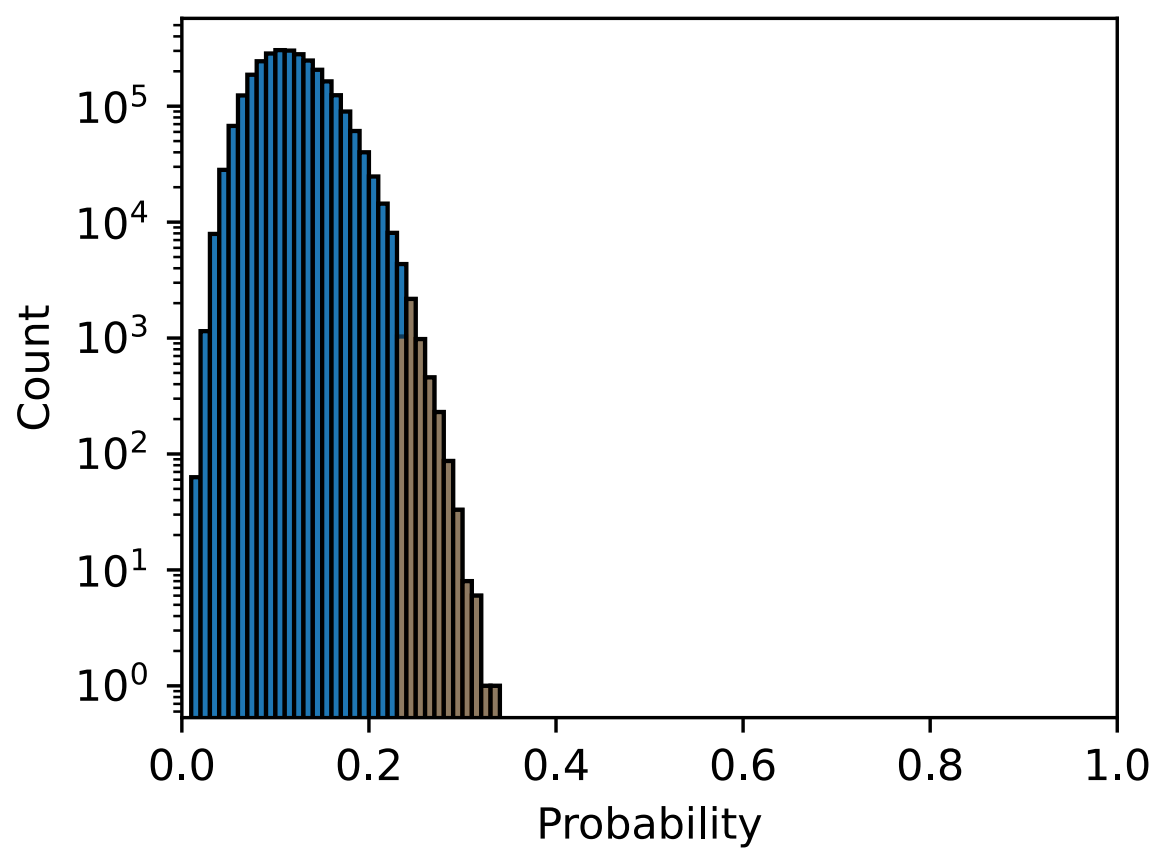

**Figure S2:** Histogram of p-values for each structure in the MD set (blue) and the NMR set (orange) for all shifts. The counts are shown on the log scale.

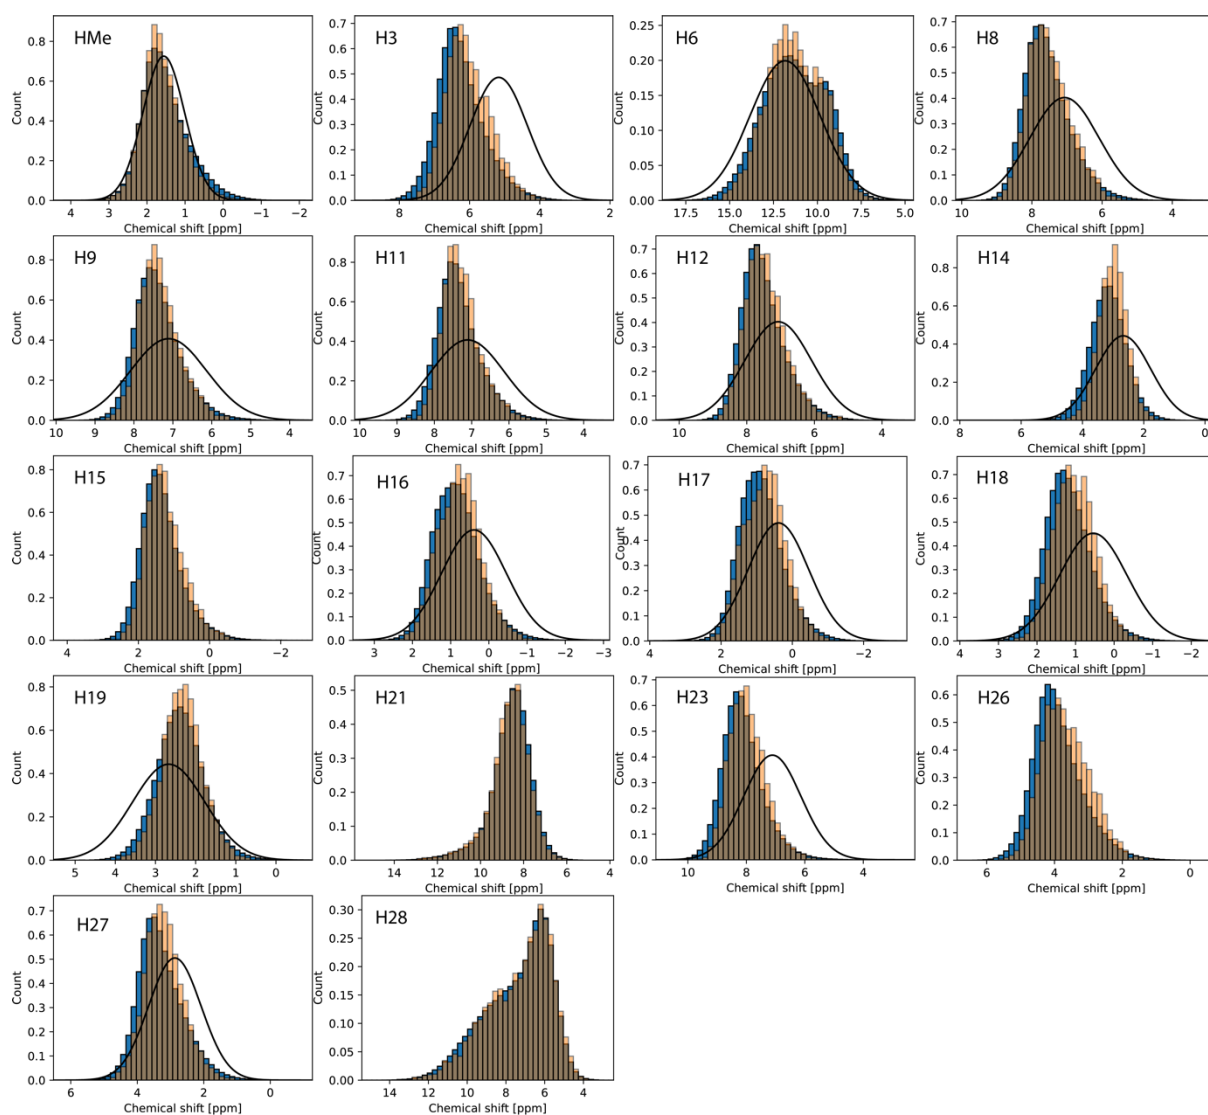

**Figure S3:** Histogram of predicted  $^1\text{H}$  chemical shifts using shiftML2 for the MD set (orange) and the NMR set (orange) with the assigned experimental distribution shown in black.



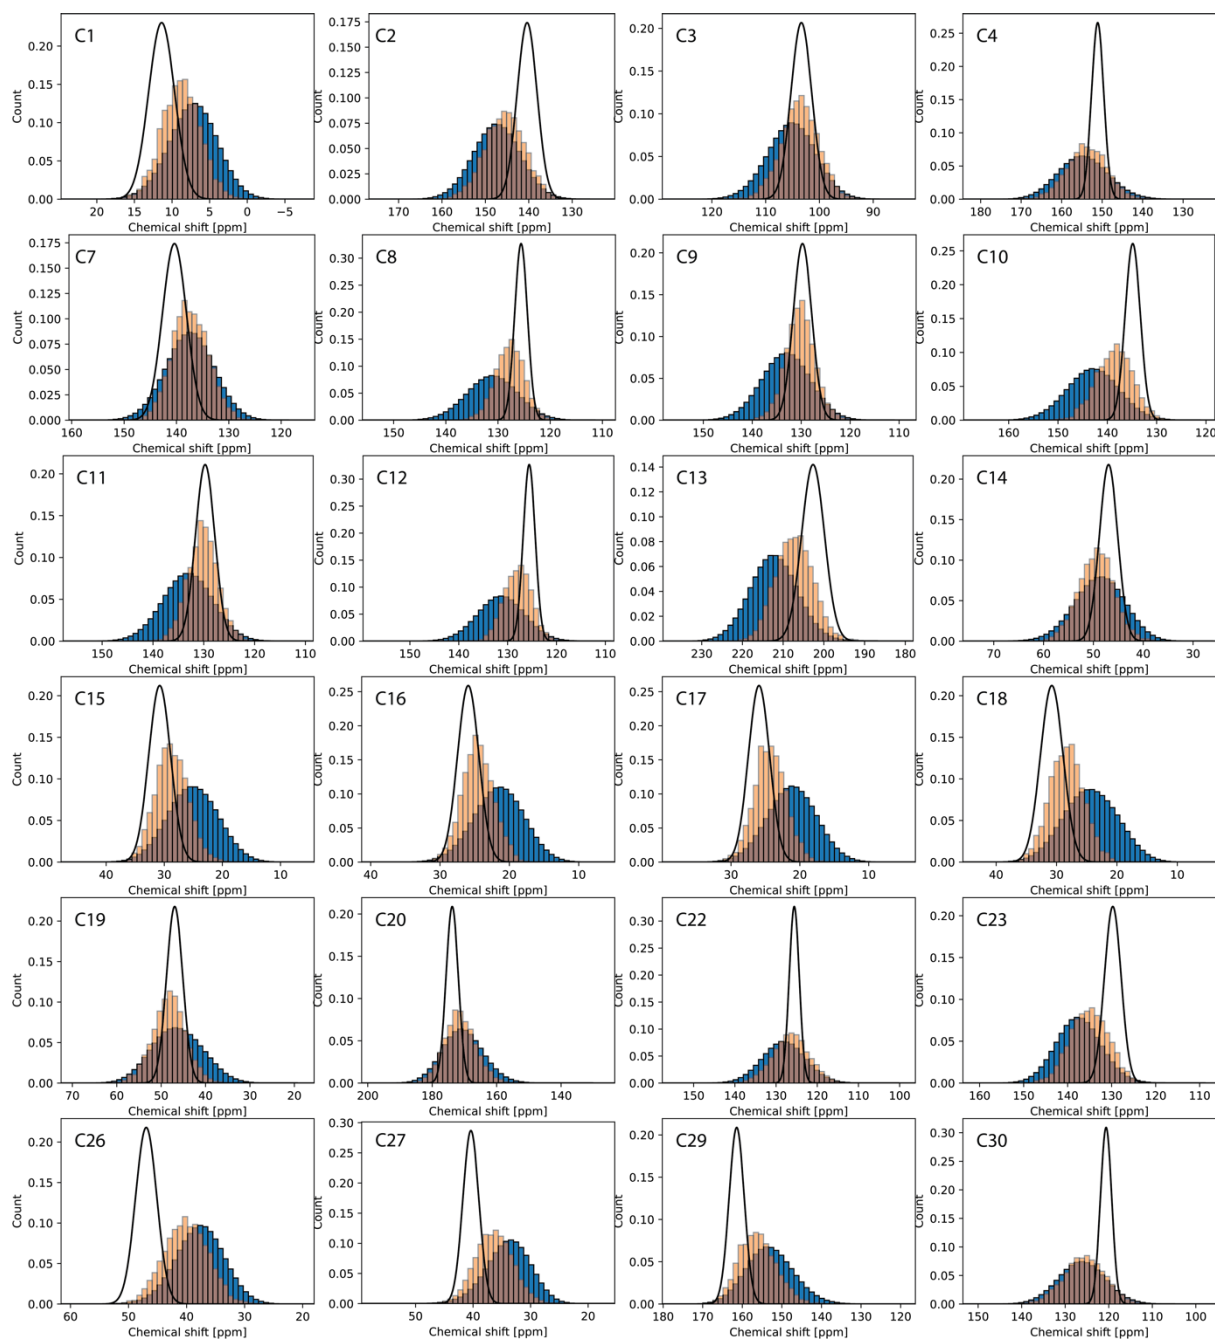

**Figure S4:** Histogram of predicted  $^{13}\text{C}$  chemical shifts using shiftML2 for the MD set (orange) and the NMR set (orange) with the experimental distribution shown in black

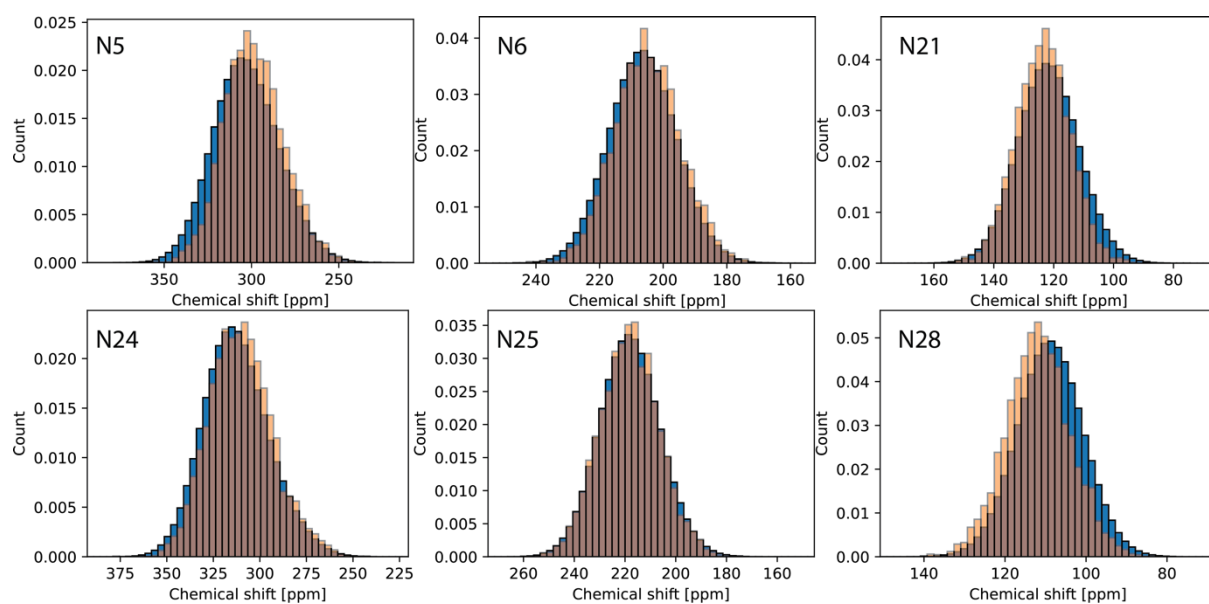

**Figure S5:** Histogram of predicted  $^{15}\text{N}$  chemical shifts using shiftML2 for the MD set (blue) and the NMR set (orange)

### Relative Cluster Energies of molecular interactions and conformations

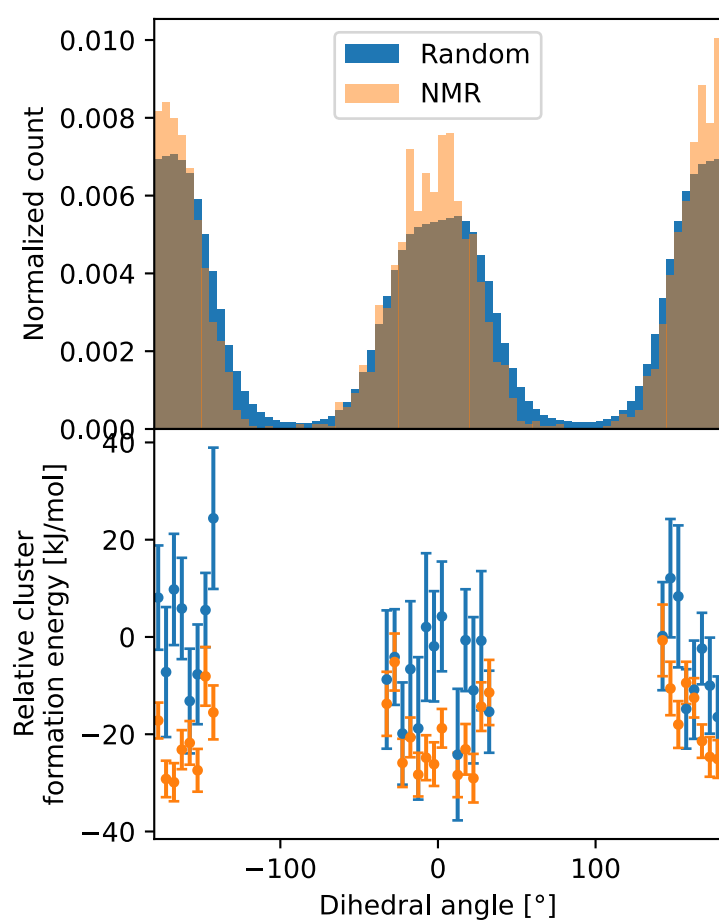

**Figure S6:** (top) histogram of torsion angle between C3-C4-C7-C8 for the MD set (blue) and the NMR set (orange). (bottom) Relative cluster energies as a function of dihedral angle for the NMR set (orange) and random selections of the MD set (orange)

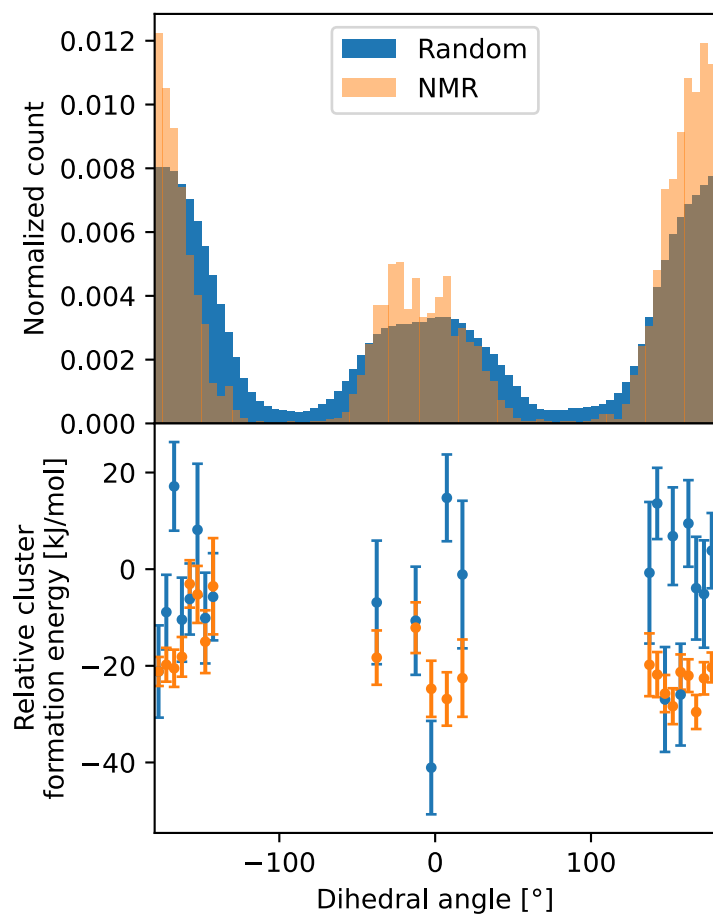

**Figure S7:** (top) histogram of torsion angle between C9-C10-C13-C14 for the MD set (blue) and the NMR set (orange). (bottom) Relative cluster energies as a function of dihedral angle for the NMR set (orange) and random selections of the MD set (orange)

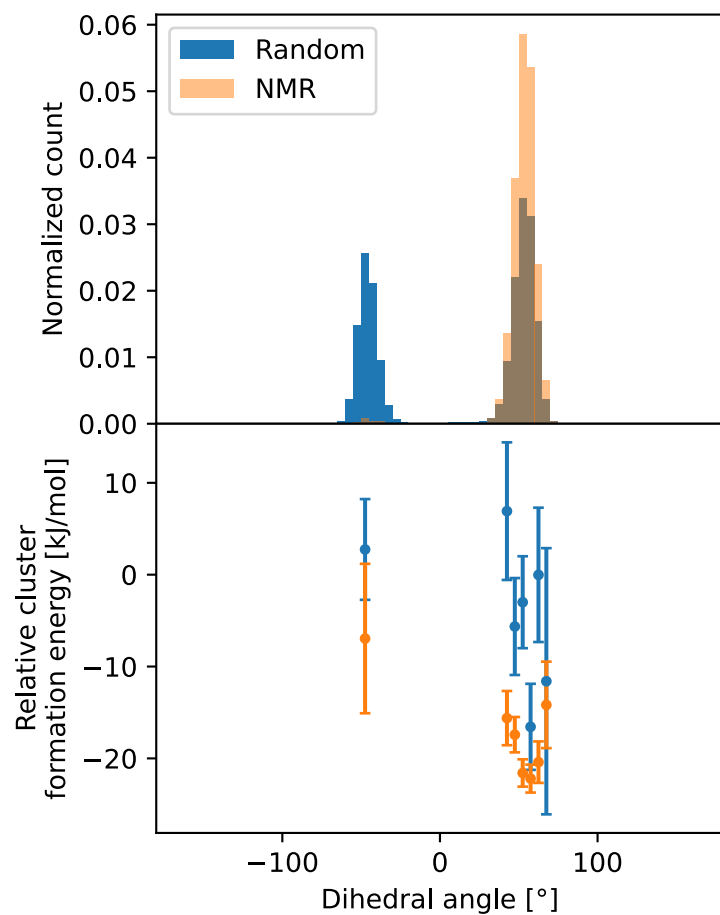

**Figure S8:** (top) histogram of torsion angle between C15-C14-C19-C18 for the MD set (blue) and the NMR set (orange). (bottom) Relative cluster energies as a function of dihedral angle for the NMR set (orange) and random selections of the MD set (orange)

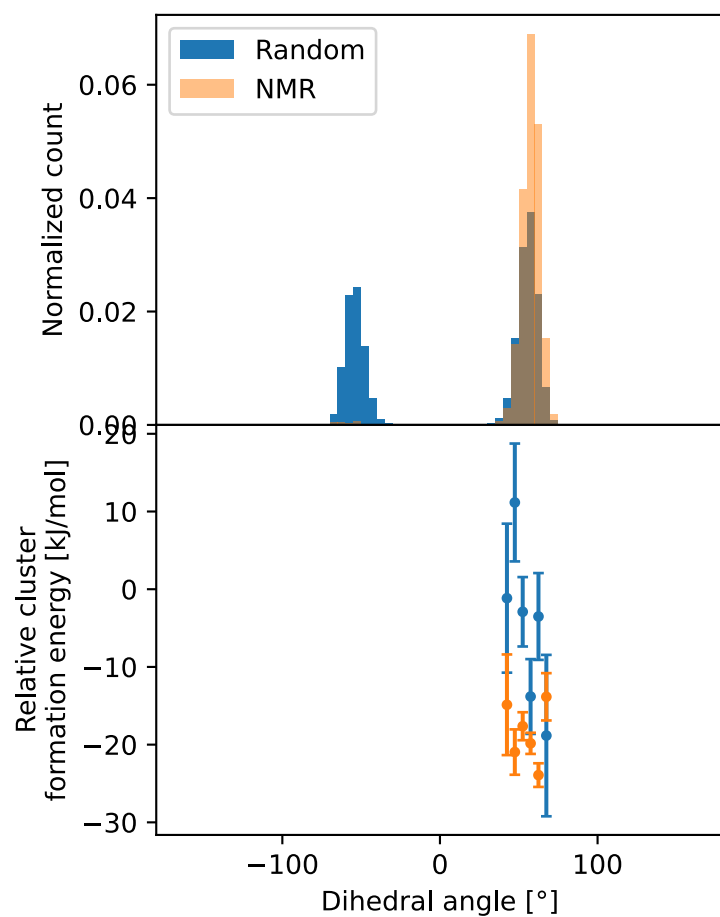

**Figure S9:** (top) histogram of torsion angle between C16-C17-C18-C19 for the MD set (blue) and the NMR set (orange). (bottom) Relative cluster energies as a function of dihedral angle for the NMR set (orange) and random selections of the MD set (orange)

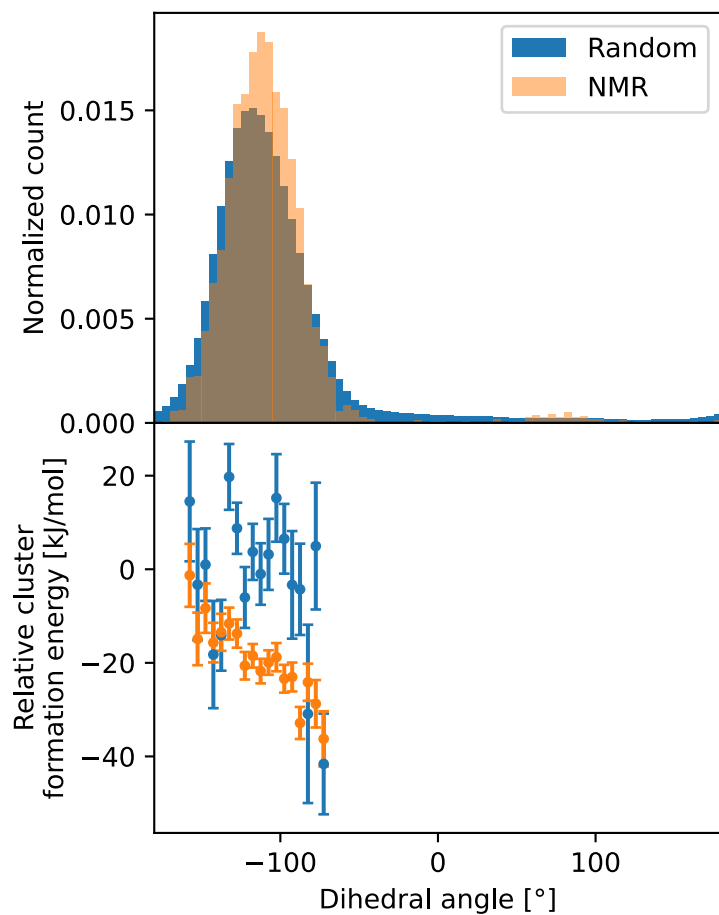

**Figure S10:** (top) histogram of torsion angle between N21-C20-C19-C18 for the MD set (blue) and the NMR set (orange). (bottom) Relative cluster energies as a function of dihedral angle for the NMR set (orange) and random selections of the MD set (orange)

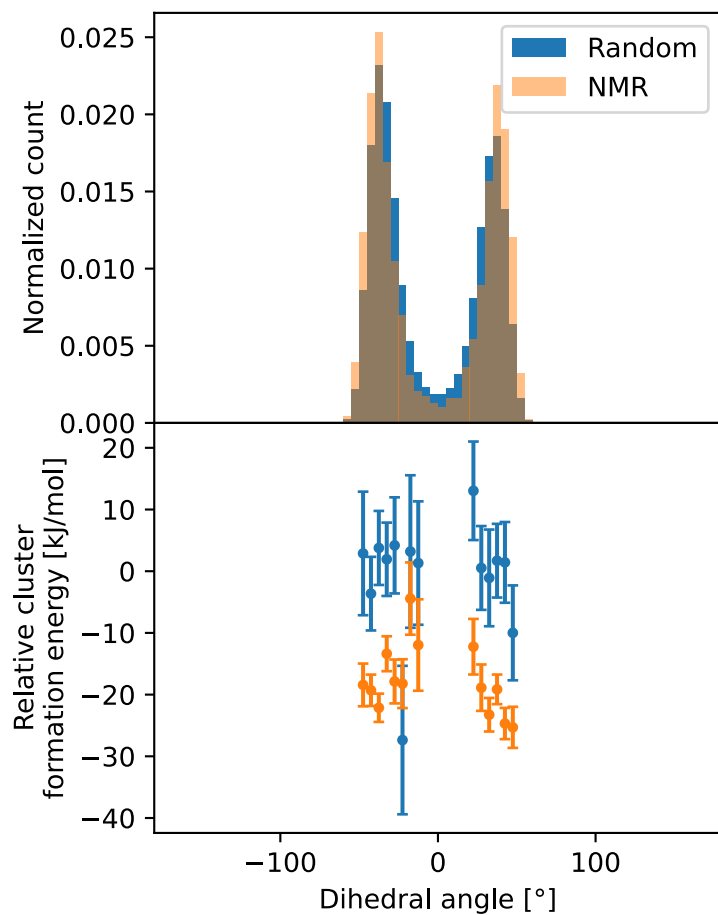

**Figure S11:** (top) histogram of torsion angle between N25-C26-C27-N28 for the MD set (blue) and the NMR set (orange). (bottom) Relative cluster energies as a function of dihedral angle for the NMR set (orange) and random selections of the MD set (orange)



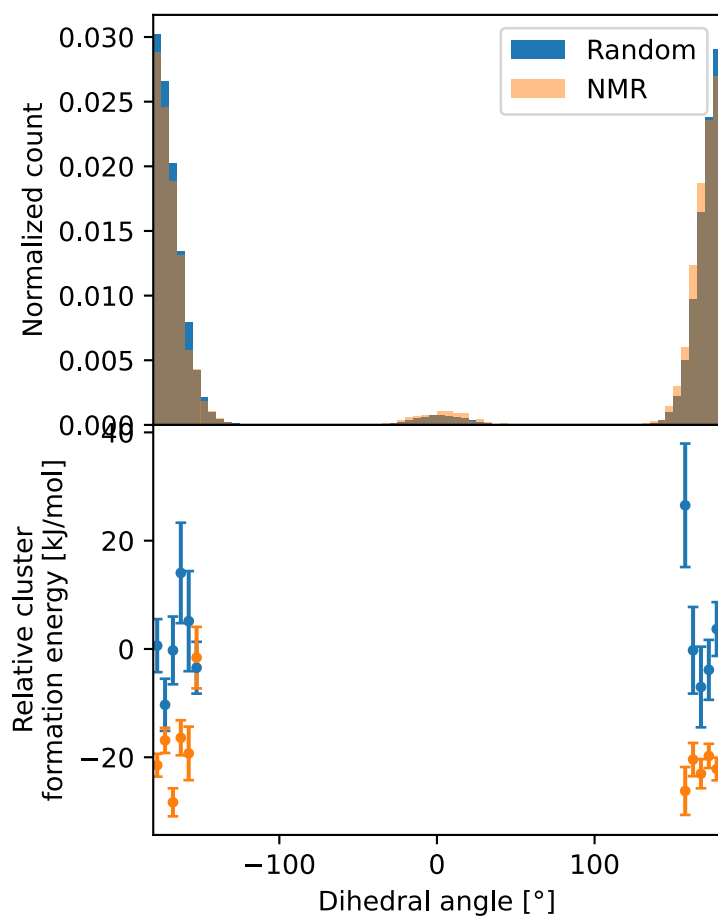

**Figure S12:** (top) histogram of torsion angle between C19-C20-N21-C22 for the MD set (blue) and the NMR set (orange). (bottom) Relative cluster energies as a function of dihedral angle for the NMR set (orange) and random selections of the MD set (orange)

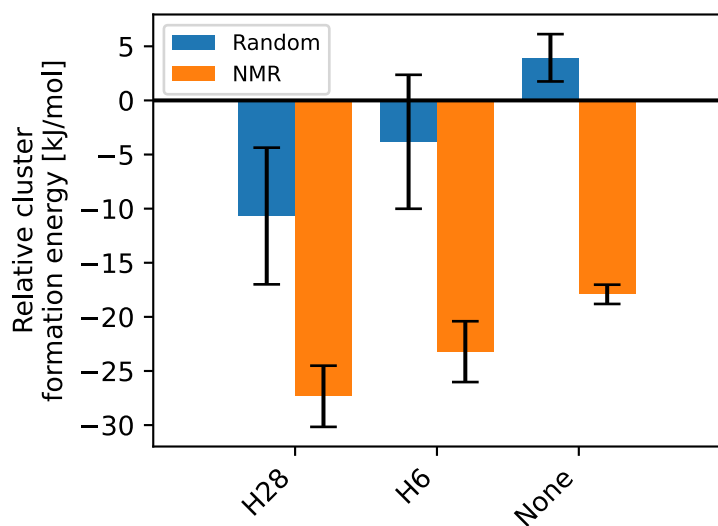

**Figure S13:** Average relative cluster energies for the hydrogen bond interaction with N5 for the MD set in (blue) and the NMR set (orange)

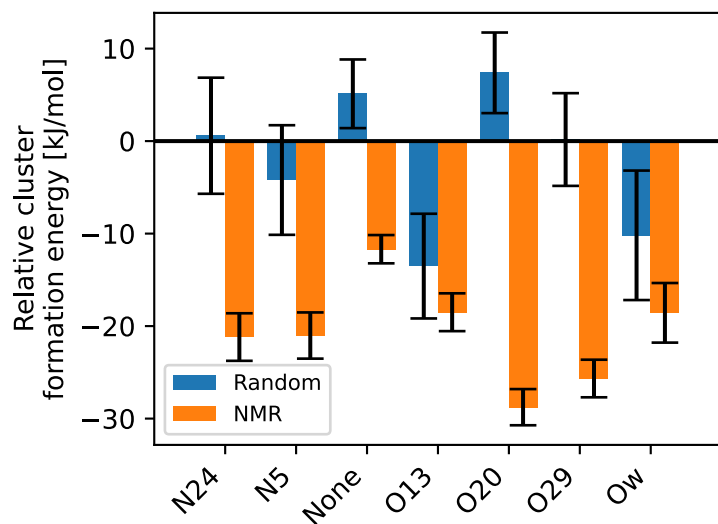

**Figure S14:** Average relative cluster energies for the hydrogen bond interaction with N5 for the MD set in (blue) and the NMR set (orange)

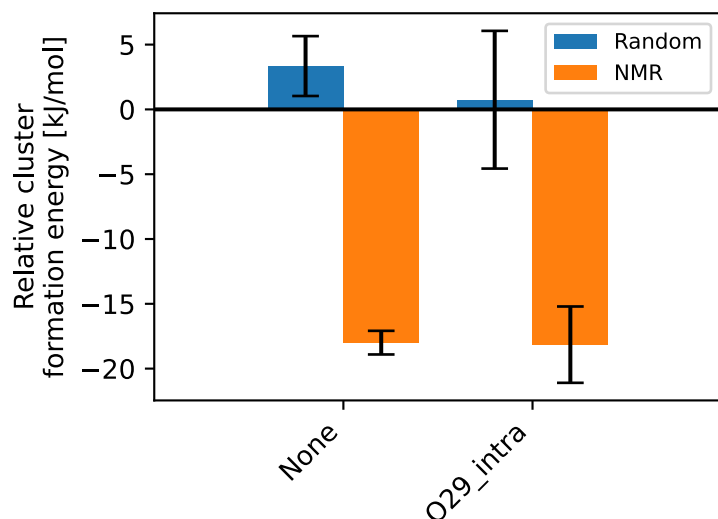

**Figure S15:** Average relative cluster energies for the hydrogen bond interaction with N21 for the MD set in (blue) and the NMR set (orange)

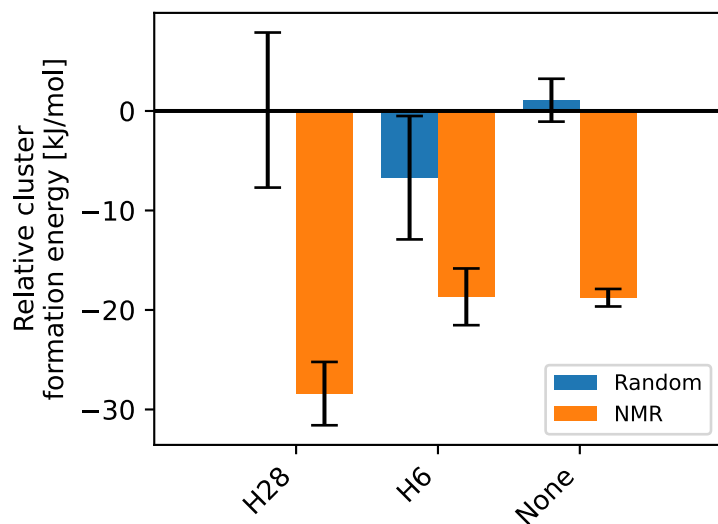

**Figure S16:** Average relative cluster energies for the hydrogen bond interaction with N24 for the MD set in (blue) and the NMR set (orange)

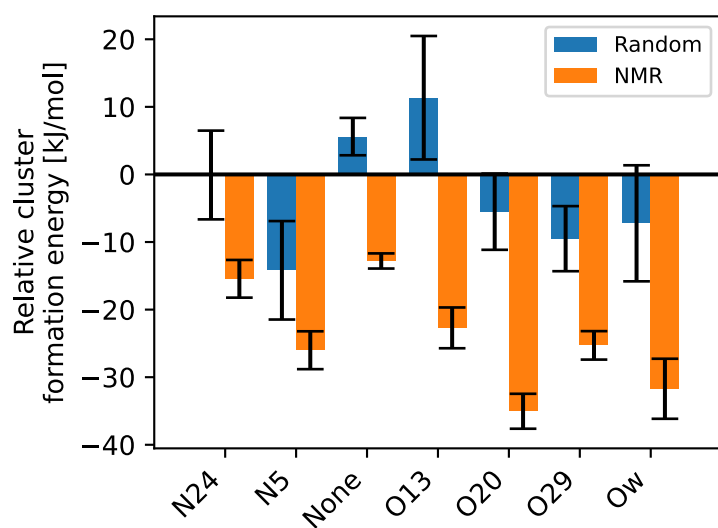

**Figure S17:** Average relative cluster energies for the hydrogen bond interaction with N28 for the MD set in (blue) and the NMR set (orange)

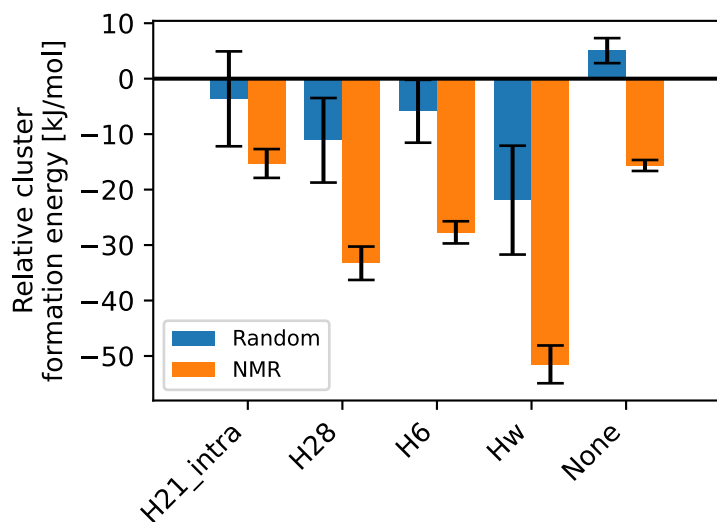

**Figure S18:** Average relative cluster energies for the hydrogen bond interaction with O13 for the MD set in (blue) and the NMR set (orange)

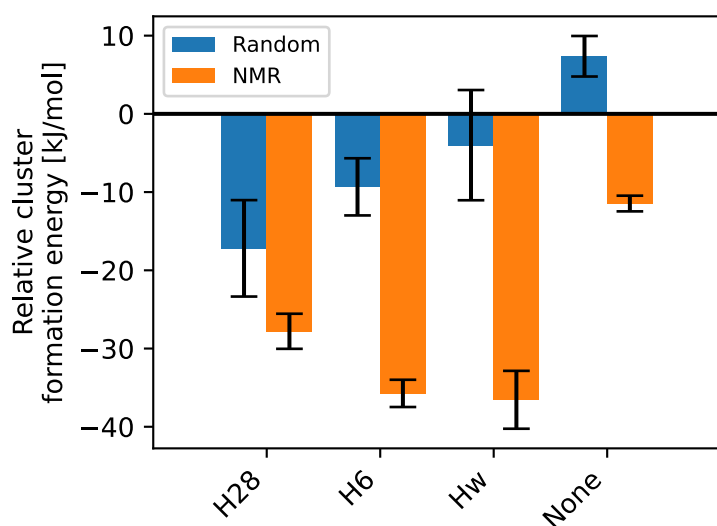

**Figure S19:** Average relative cluster energies for the hydrogen bond interaction with O20 for the MD set in (blue) and the NMR set (orange)

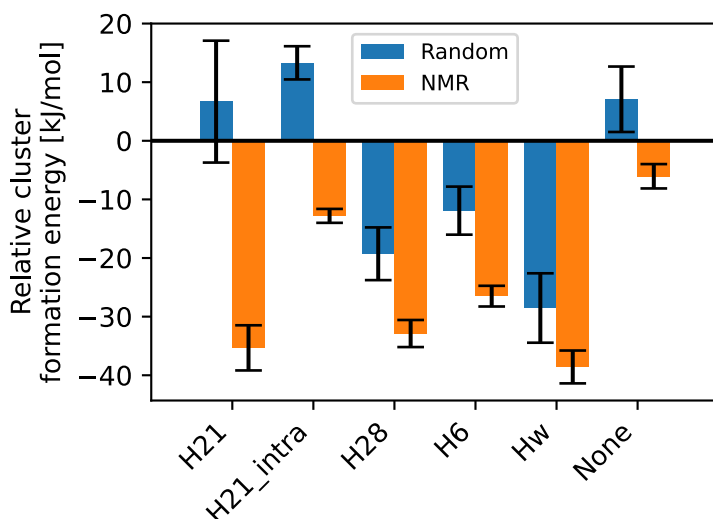

**Figure S20:** Average relative cluster energies for the hydrogen bond interaction with O29 for the MD set in (blue) and the NMR set (orange)

## References

- 1 Cordova, M. *et al.* Structure determination of an amorphous drug through large-scale NMR predictions. *Nature Communications* **12**, 2964 (2021).
- 2 Becke, A. D. Density-Functional Thermochemistry .3. The Role of Exact Exchange. *J Chem Phys* **98**, 5648-5652 (1993). <https://doi.org/10.1063/1.464913>
- 3 Grimme, S., Antony, J., Ehrlich, S. & Krieg, H. A consistent and accurate ab initio parametrization of density functional dispersion correction (DFT-D) for the 94 elements H-Pu. *J Chem Phys* **132** (2010). <https://doi.org/10.1063/1.3382344>  
Pmid 20423165
- 4 Rassolov, V. A., Ratner, M. A., Pople, J. A., Redfern, P. C. & Curtiss, L. A. 6-31G\*basis set for third-row atoms. *Journal of Computational Chemistry* **22**, 976-984 (2001). <https://doi.org/10.1002/jcc.1058>
- 5 Stephens, P. J., Devlin, F. J., Chabalowski, C. F. & Frisch, M. J. Ab-Initio Calculation of Vibrational Absorption and Circular-Dichroism Spectra Using Density-Functional Force-Fields. *J Phys Chem-Us* **98**, 11623-11627 (1994). <https://doi.org/10.1021/j100096a001>
- 6 Gaussian 09 v. Revision D.01 (Gaussian, Inc., Wallingford CT, 2016).
- 7 BIOVIA Materials Studio v. Release 2017 (BIOVIA, Dassault Systèmes, San Diego, 2017).
- 8 Sun, H. *et al.* COMPASS II: extended coverage for polymer and drug-like molecule databases. *J Mol Model* **22** (2016). <https://doi.org/10.1007/s00894-016-2909-0>
- 9 Banks, J. L. *et al.* Integrated modeling program, applied chemical theory (IMPACT). *Journal of Computational Chemistry* **26**, 1752-1780 (2005). <https://doi.org/10.1002/jcc.20292>

- 10 Jorgensen, W. L., Maxwell, D. S. & TiradoRives, J. Development and testing of the OPLS all-atom force field on conformational energetics and properties of organic liquids. *Journal of the American Chemical Society* **118**, 11225-11236 (1996). <https://doi.org/DOI 10.1021/ja9621760>
- 11 ffld\_server v. Release 2017-3 (Schrodinger, LLC, New York, NY, 2017).
- 12 Frolov, A. I. & Kiselev, M. G. Prediction of Cosolvent Effect on Solvation Free Energies and Solubilities of Organic Compounds in Supercritical Carbon Dioxide Based on Fully Atomistic Molecular Simulations. *J Phys Chem B* **118**, 11769-11780 (2014). <https://doi.org/10.1021/jp505731z>
- 13 Jorgensen, W. L., Chandrasekhar, J., Madura, J. D., Impey, R. W. & Klein, M. L. Comparison of Simple Potential Functions for Simulating Liquid Water. *J Chem Phys* **79**, 926-935 (1983). <https://doi.org/Doi 10.1063/1.445869>
